# Supplementary material for: Tobacco alkaloid absorption induced bitterness in pea plants
Source: Research Square preprint supplement (doi:10.21203/rs.3.rs-6609722/v1), 2025-06-06
Supplement: Supplementary file 1 [file 91084a63a1381ce0361a9d9d.docx]

In our previous research, we observed the year-by-year accumulation of tobacco alkaloids in the soil from tobacco planting. As an allelochemical, tobacco alkaloids can be absorbed and transported by other crops to various organs, affecting their growth and quality. Tobacco alkaloids represented by myosmine were absorbed by the pea roots, transported upward, and accumulated in large amounts in the leaves, causing a bitter taste. Moreover, high concentrations of tobacco alkaloids inhibited the content of chlorophyll and carotenoids in the leaves and caused oxidative damage to the cell membranes through allelopathy. In response to tobacco alkaloid stress, pea plants increased hormone content, inhibited the synthesis of carbohydrates, and stimulated the biosynthesis of flavonoids, terpenoids, and amino acids, reducing the content of sweet substances and increasing the amount of bitter substances in the leaves. Finally, the nutrient structure of the leaves changed and the bitterness was aggravated.
